# Supplementary material for: Lentiviral Hematopoietic Stem Cell Gene Therapy Rescues Clinical Phenotypes in a Murine Model of Pompe Disease
Source: PubMed Central journal article supplement (PMC7396971; doi:10.1016/j.omtm.2020.07.001), 2020-07-06
Supplement: mmc1.pdf [file mmc1.pdf]

**OMTM, Volume 18**

## **Supplemental Information**

### **Lentiviral Hematopoietic Stem Cell**

### **Gene Therapy Rescues Clinical Phenotypes**

### **in a Murine Model of Pompe Disease**

**Giuseppa Piras, Claudia Montiel-Equihua, Yee-Ka Agnes Chan, Slawomir Wantuch, Daniel Stuckey, Derek Burke, Helen Prunty, Rahul Phadke, Darren Chambers, Armando Partida-Gaytan, Diego Leon-Rico, Neelam Panchal, Kathryn Whitmore, Miguel Calero, Sara Benedetti, Giorgia Santilli, Adrian J. Thrasher, and H. Bobby Gaspar**

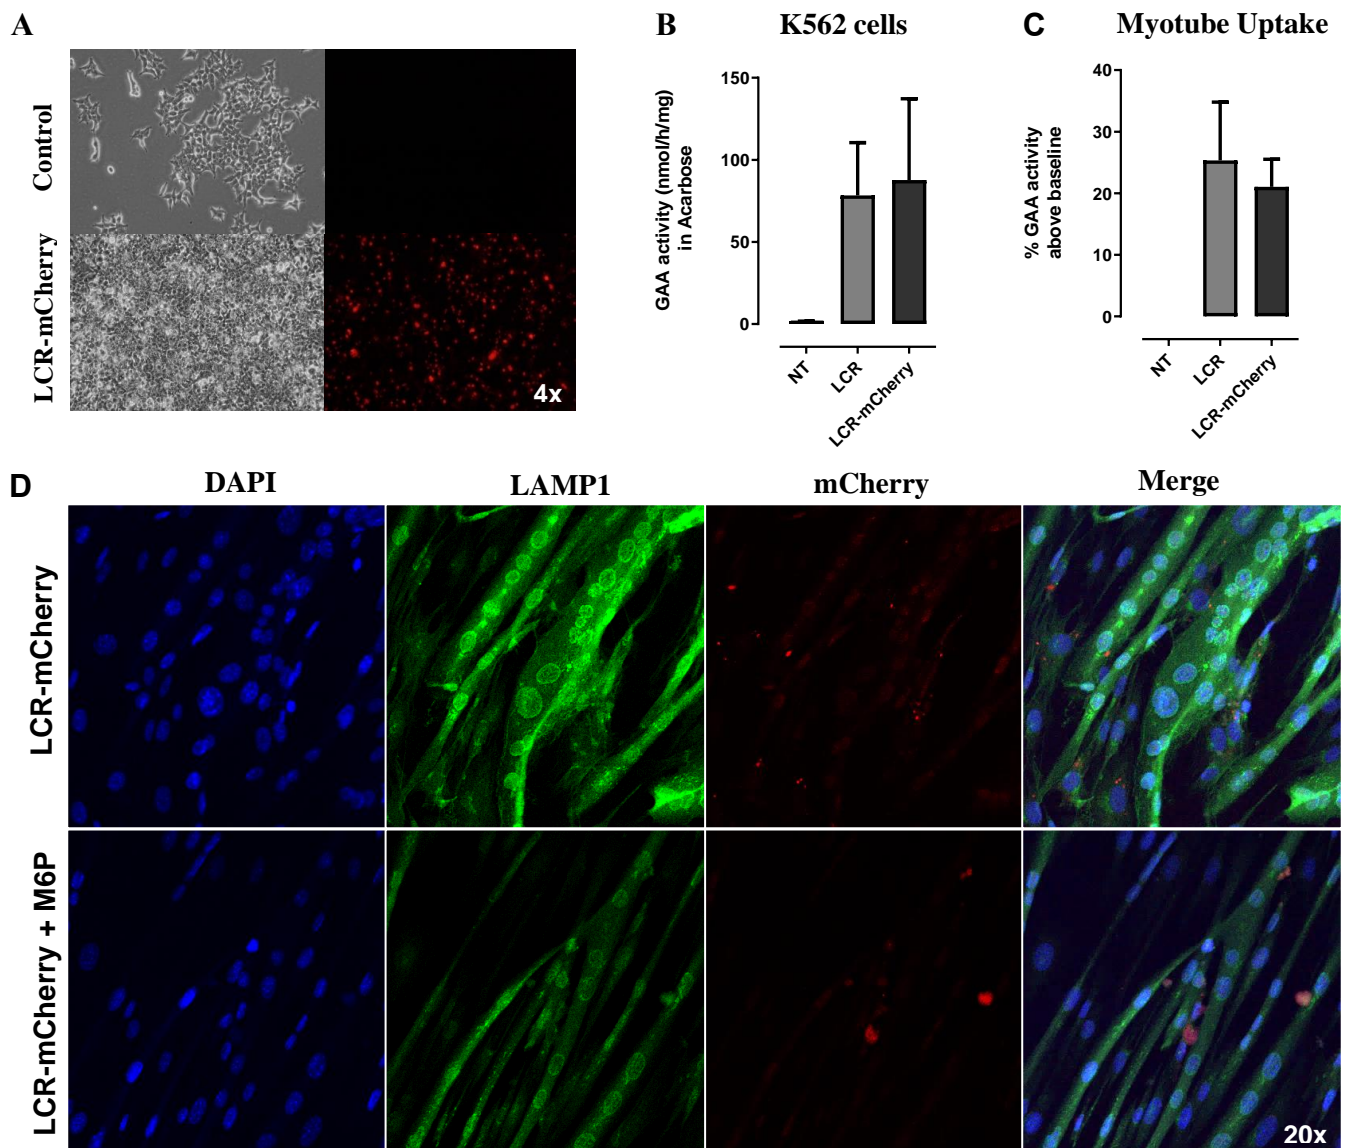

**Figure S1. Evaluation of hGAAmCherry fusion protein.** **A)** Representation of control 293T cells and packaging cells after transfection with LV.LCR-EFS.GAAmCherry (LCRmCherry). **B)** GAA activity measured in unmanipulated (NT) and transduced either with LV.LCR-EFS.GAA (LCR) or LCRmCherry K562 cells. **C)** Increase of GAA activity in murine myotube cells above baseline after exposure for 24 h to media conditioned for 3 days by unmanipulated K562 cells (NT), LCR or LCRmCherry transduced K562 cells. **D)** Representative H2K-2B4 myotubes images after exposure to 1 $\mu$ M GAAmCherry in presence or absence of 5mM M6P. Myotubes were stained for nuclei (DAPI), lysosomes (LAMP-1) and GAA (mCherry) detection. Data are shown as means  $\pm$  SEM of 2 independent experiments.

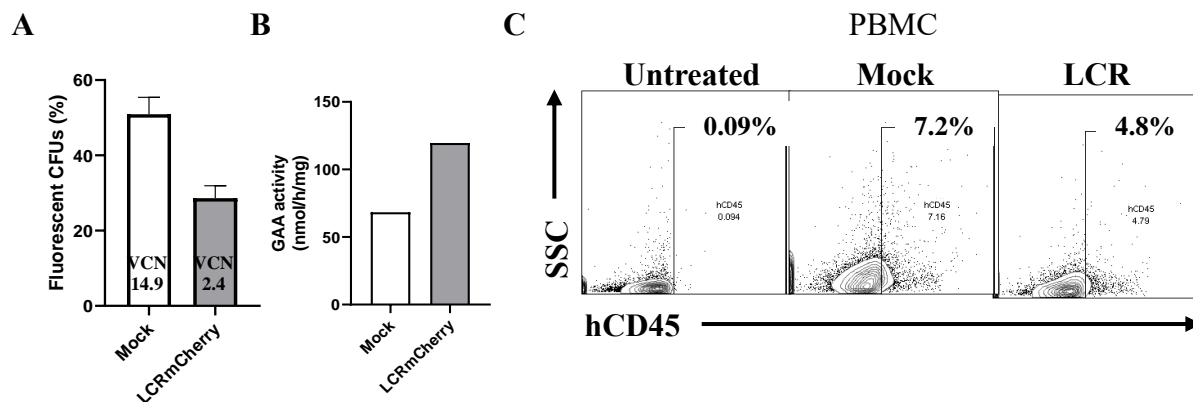

**Figure S2. hCD34<sup>+</sup> cells transduced with LV.LCR-EFS.GAAmCherry vector.** **A)** Percentage of fluorescent positive colonies in the CFUs of Mock or LV.LCR-EFS.GAAmCherry (LCRmCherry) transduced hCD34<sup>+</sup> cells. Data are shown as means  $\pm$  SD. **B)** GAA activity measured in hCD34<sup>+</sup> cells left in culture for 10 days after transduction with Mock or LCRmCherry vector. **C)** Representative FACS analysis of hCD45<sup>+</sup> cells detected in PBMC of untreated (n=4), mock or LCRmCherry transplanted NSG mice (8 mice per group) at 15 weeks post-transplant.

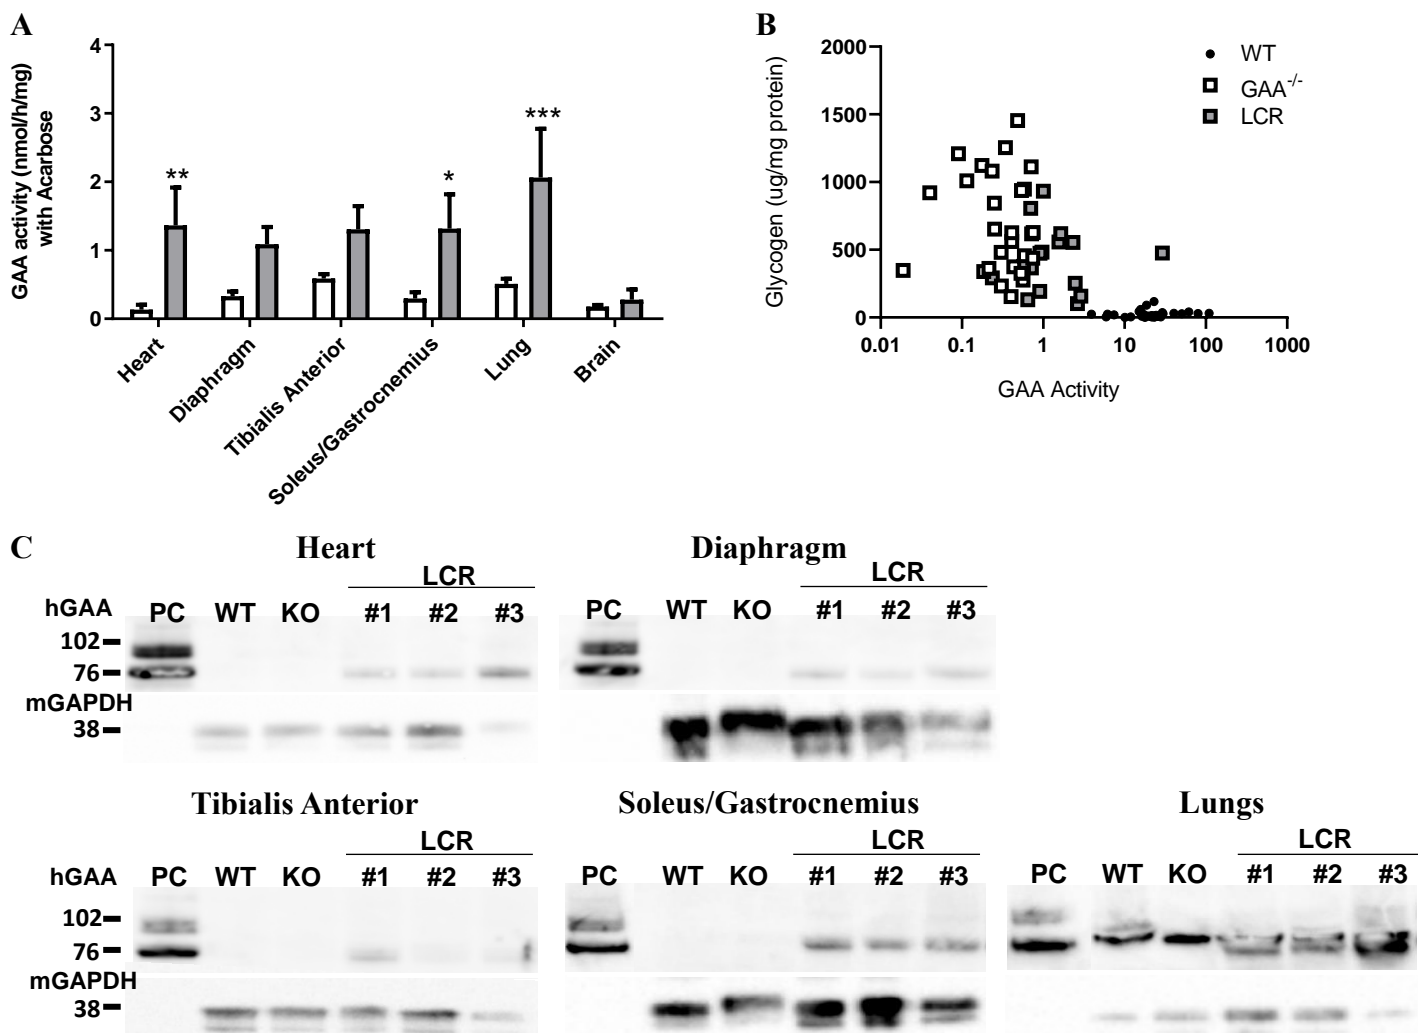

**Figure S3. hGAA detected in tissues of treated GAA<sup>-/-</sup> mice.** **A**) GAA activity measured in tissue homogenates of GAA<sup>-/-</sup> control mice (white bar) or their littermates treated with LV.LCR-EFS.GAA HSC gene therapy (LCR; grey bar). Data are shown as means  $\pm$  SEM of 2 independent experiments with n=3-6 mice per group. **B**) Scatter plot displaying the relation between glycogen content and GAA activity in tissues of wild type (black dot), GAA<sup>-/-</sup> (white square) and LCR treated mice. **C**) Western blot of hGAA in heart, diaphragm, tibialis anterior, soleus/gastrocnemius or lung homogenates of wild type, GAA<sup>-/-</sup> and LCR treated mice. mGAPDH blot was used as loading control. PC: lysate of LCR transduced 293T cells used as positive control for hGAA.

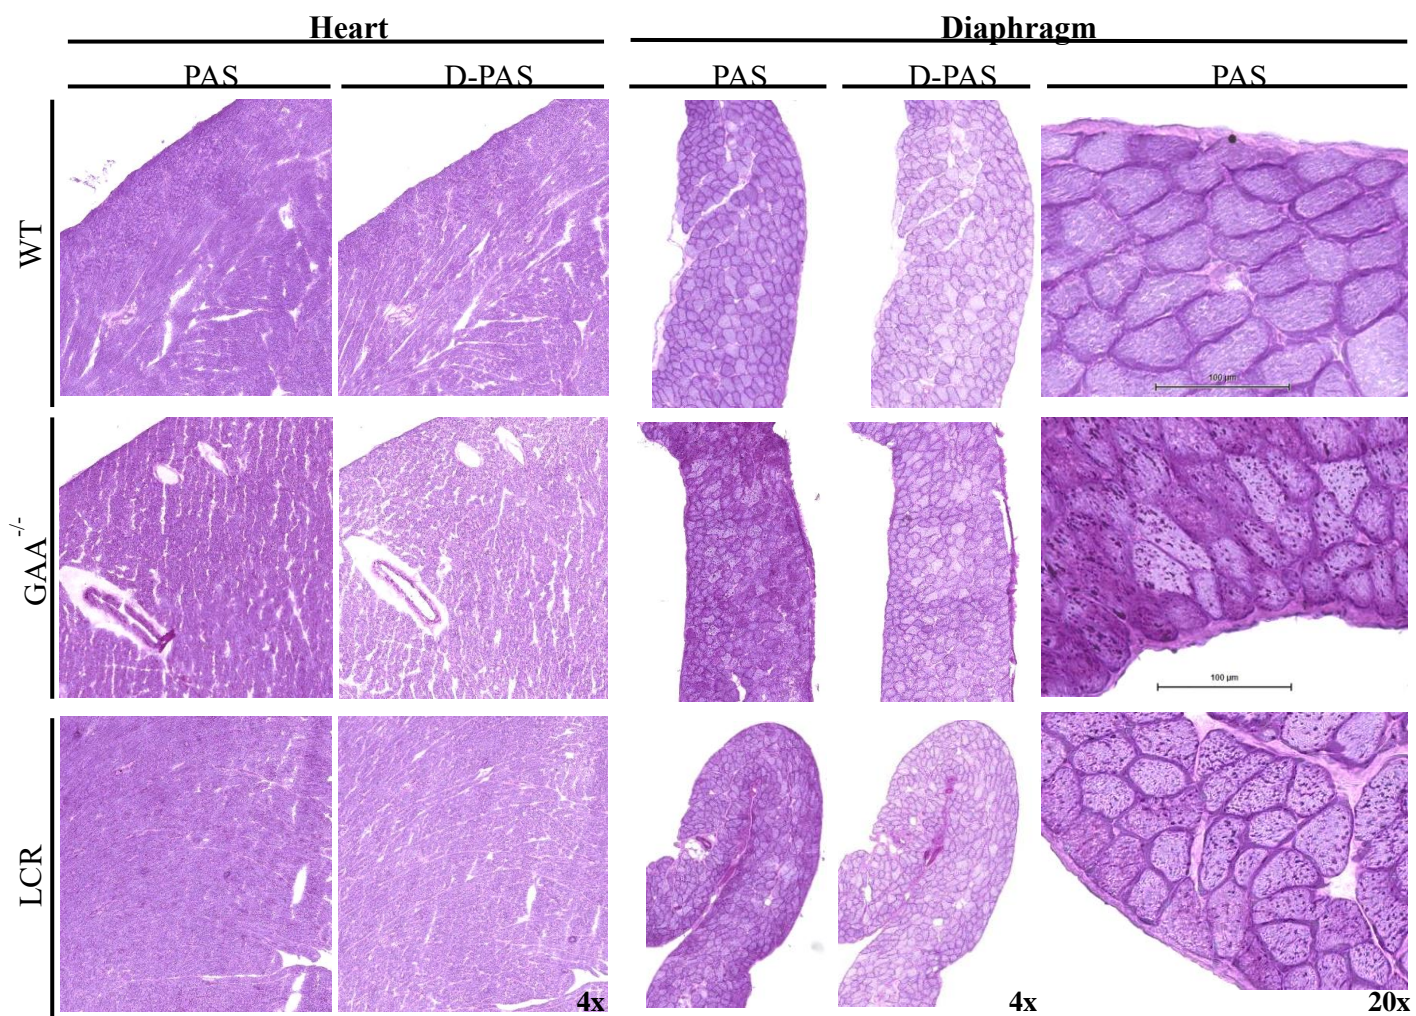

**Figure S4. Histology of heart and diaphragm: glycogen staining.** Representative images of PAS/ D-PAS staining of heart and diaphragm of wild type, GAA<sup>-/-</sup> and LV.LCR-EFS.GAA (LCR) treated mice.

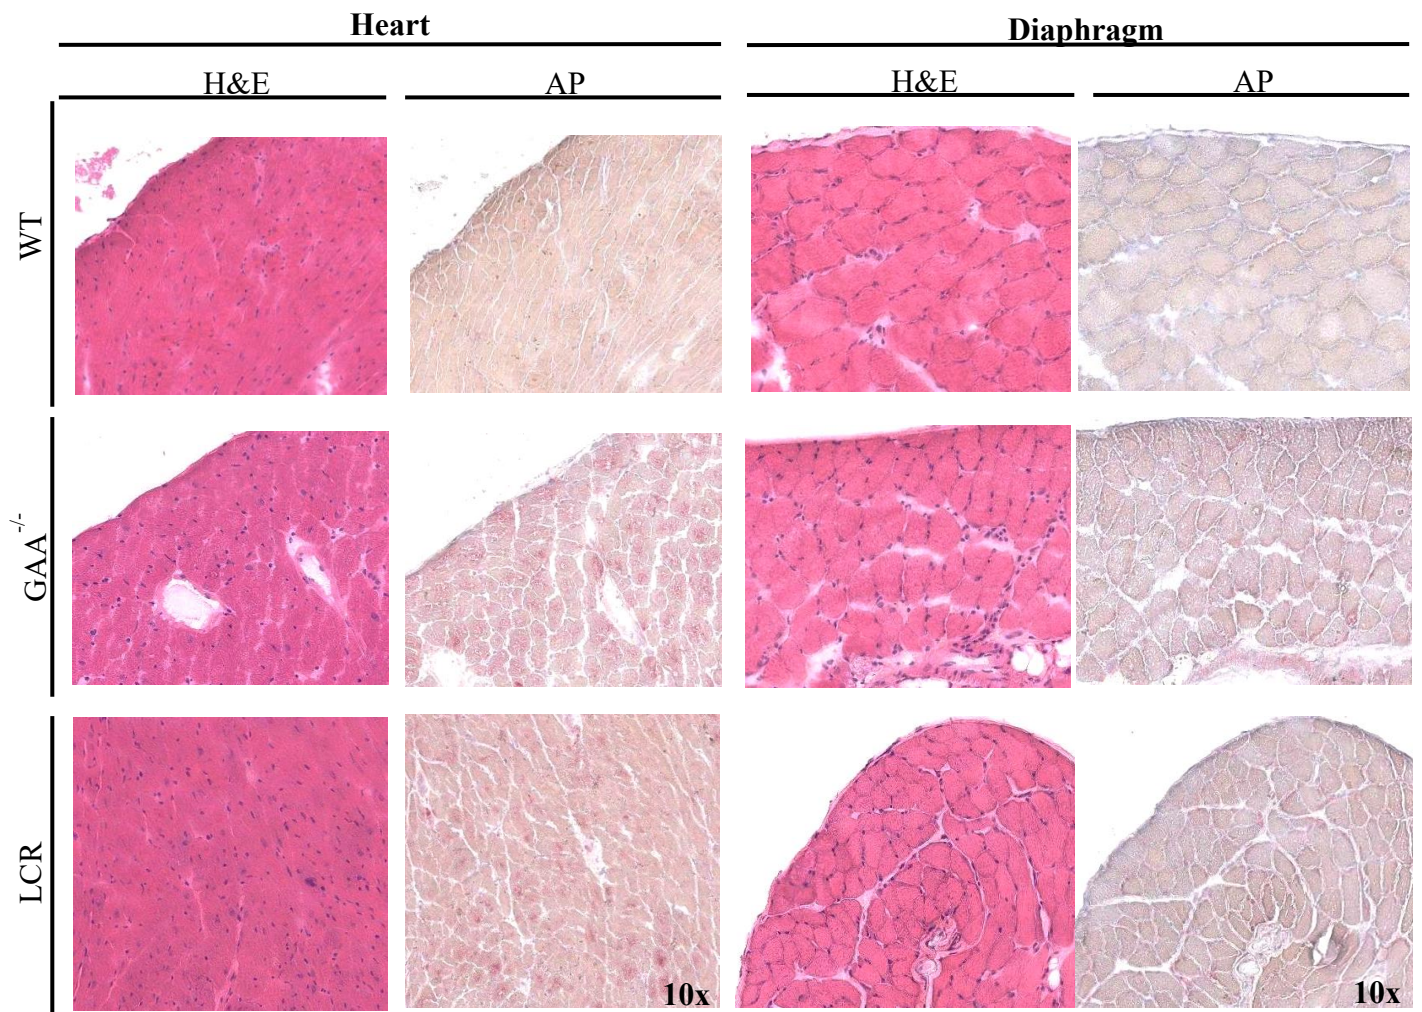

**Figure S5. Histology of heart and diaphragm: assessment of pathology.** Representative images of H&E and Acid Phosphatase (AP) staining of heart and diaphragm of wild type, GAA<sup>-/-</sup> and LV.LCR-EFS.GAA (LCR) treated mice.

**Table S1. Details on the experimental conditions for LV.LCR-EFS.GAA modified animals**

| ID           | Genotype                 | Gender   | Conditioning       | Reconstitution |                           | PBMC<br>3mo |             | PBMC<br>6mo |             | Bone marrow<br>6mo |            | Bu Toxicity <sup>a</sup> | Tested     |
|--------------|--------------------------|----------|--------------------|----------------|---------------------------|-------------|-------------|-------------|-------------|--------------------|------------|--------------------------|------------|
|              |                          |          |                    | Cell type      | Cell Number               | VCN         | Y Chr       | VCN         | Y Chr       | VCN                | Y Chr      |                          |            |
| TP1_1        | GAA <sup>-/-</sup>       | F        | 25mg/kg/day        | Lin-           | 0.5x10 <sup>6</sup>       | -           | -           | -           | -           | -                  | -          | Yes                      | No         |
| <b>TP1_2</b> | <b>GAA<sup>-/-</sup></b> | <b>F</b> | <b>25mg/kg/day</b> | <b>Lin-</b>    | <b>0.5x10<sup>6</sup></b> | <b>0.87</b> | <b>100%</b> | <b>1.2</b>  | <b>100%</b> | <b>0.42</b>        | <b>52%</b> | <b>No</b>                | <b>Yes</b> |
| <b>TP1_3</b> | <b>GAA<sup>-/-</sup></b> | <b>F</b> | <b>25mg/kg/day</b> | <b>Lin-</b>    | <b>0.5x10<sup>6</sup></b> | <b>1.44</b> | <b>100%</b> |             |             | <b>1.22</b>        | <b>53%</b> | <b>No</b>                | <b>Yes</b> |
| TP1_4        | GAA <sup>-/-</sup>       | F        | 25mg/kg/day        | Lin-           | 0.5x10 <sup>6</sup>       | -           | -           | -           | -           | -                  | -          | Yes                      | No         |
| TP1_5        | GAA <sup>-/-</sup>       | F        | 25mg/kg/day        | Lin-           | 0.5x10 <sup>6</sup>       | -           | -           | -           | -           | -                  | -          | Yes                      | No         |
| TP2_1        | GAA <sup>-/-</sup>       | F        | 25mg/kg/day        | Lin-           | 0.5x10 <sup>6</sup>       | 0.03        | 0           | 0.02        | 0           | 0.001              | 0          | No                       | No         |
| <b>TP2_2</b> | <b>GAA<sup>-/-</sup></b> | <b>F</b> | <b>25mg/kg/day</b> | <b>Lin-</b>    | <b>0.5x10<sup>6</sup></b> | <b>1.05</b> | <b>78%</b>  | <b>1.11</b> | <b>82%</b>  | <b>1.43</b>        | <b>65%</b> | <b>No</b>                | <b>Yes</b> |
| TP2_3        | GAA <sup>-/-</sup>       | F        | 25mg/kg/day        | Lin-           | 0.5x10 <sup>6</sup>       | -           | -           | -           | -           | -                  | -          | Yes                      | No         |
| TP2_4        | GAA <sup>-/-</sup>       | F        | 25mg/kg/day        | Lin-           | 0.5x10 <sup>6</sup>       | -           | -           | -           | -           | -                  | -          | Yes                      | No         |
| TP2_5        | GAA <sup>-/-</sup>       | F        | 25mg/kg/day        | Lin-           | 0.5x10 <sup>6</sup>       | -           | -           | -           | -           | -                  | -          | Yes                      | No         |
| TP2_6        | GAA <sup>-/-</sup>       | F        | 25mg/kg/day        | Lin-           | 0.5x10 <sup>6</sup>       | -           | -           | -           | -           | -                  | -          | Yes                      | No         |
| TP2_7        | GAA <sup>-/-</sup>       | F        | 25mg/kg/day        | Lin-           | 0.5x10 <sup>6</sup>       | -           | -           | -           | -           | -                  | -          | Yes                      | No         |
| TP2_8        | GAA <sup>-/-</sup>       | F        | 25mg/kg/day        | Lin-           | 0.5x10 <sup>6</sup>       | -           | -           | -           | -           | -                  | -          | Yes                      | No         |
| TP2_9        | GAA <sup>-/-</sup>       | F        | 25mg/kg/day        | Lin-           | 0.5x10 <sup>6</sup>       | -           | -           | -           | -           | -                  | -          | Yes                      | No         |
| TP2_10       | GAA <sup>-/-</sup>       | F        | 25mg/kg/day        | Lin-           | 0.5x10 <sup>6</sup>       | -           | -           | -           | -           | -                  | -          | Yes                      | No         |
| <b>TP4_1</b> | <b>GAA<sup>-/-</sup></b> | <b>F</b> | <b>6 Gy + 4 Gy</b> | <b>LSK+</b>    | <b>1.2x10<sup>5</sup></b> | <b>0.55</b> | <b>55%</b>  | <b>0.37</b> |             | -                  | -          | <b>No</b>                | <b>Yes</b> |
| <b>TP4_2</b> | <b>GAA<sup>-/-</sup></b> | <b>F</b> | <b>6 Gy + 4 Gy</b> | <b>LSK+</b>    | <b>1.2x10<sup>5</sup></b> | <b>0.27</b> | <b>36%</b>  | <b>0.34</b> |             | -                  | -          | <b>No</b>                | <b>Yes</b> |
| <b>TP4_3</b> | <b>GAA<sup>-/-</sup></b> | <b>F</b> | <b>6 Gy + 4 Gy</b> | <b>LSK+</b>    | <b>1.2x10<sup>5</sup></b> | <b>0.50</b> | <b>43%</b>  | -           | -           | -                  | -          | <b>No</b>                | <b>Yes</b> |
| <b>TP4_4</b> | <b>GAA<sup>-/-</sup></b> | <b>F</b> | <b>6 Gy + 4 Gy</b> | <b>LSK+</b>    | <b>1.2x10<sup>5</sup></b> | <b>0.22</b> | <b>49%</b>  | <b>0.3</b>  |             | -                  | -          | <b>No</b>                | <b>Yes</b> |
| <b>TP4_5</b> | <b>GAA<sup>-/-</sup></b> | <b>F</b> | <b>6 Gy + 4 Gy</b> | <b>LSK+</b>    | <b>1.2x10<sup>5</sup></b> | <b>0.30</b> | <b>49%</b>  | <b>0.2</b>  |             | -                  | -          | <b>No</b>                | <b>Yes</b> |

a) Most of the animals receiving 25mg/kg/day Busilvex developed bloated abdomen linked to gastro-intestinal inflammation. Busilvex, used in clinical trials for HSPC transplants and preclinical study using C57BL/6 mice, revealed toxicity when used to transplant wild type mice in our genetic background, indicating that mice of this strain background do not tolerate the formulation of Busilvex.

**Table S2. Glycogen storage measured post-mortem in different tissues. Percentage of reduction of glycogen storage from knock-out control group in LV.LCR-EFS.GAA (LCR) transplanted group.**

| Glycogen             | WT    |       |   | GAA <sup>-/-</sup> |        |   | LCR    |        |   | Glycogen Reduction (%) |
|----------------------|-------|-------|---|--------------------|--------|---|--------|--------|---|------------------------|
|                      | Mean  | SEM   | N | Mean               | SEM    | N | Mean   | SEM    | N |                        |
| Heart                | 20.5  | 14.17 | 6 | 809.86             | 156.03 | 5 | 270.39 | 50.78  | 3 | 66.6                   |
| Diaphragm            | 46.13 | 16.1  | 6 | 976.90             | 133.44 | 5 | 765.28 | 110.33 | 3 | 21.7                   |
| Tibialis Anterior    | 24.38 | 7.09  | 5 | 854.78             | 185.57 | 5 | 526.37 | 46.74  | 3 | 38.4                   |
| Soleus/Gastrocnemius | 24.02 | 3.09  | 6 | 654.95             | 107.28 | 5 | 548.79 | 41.04  | 3 | 16.2                   |
| Lung                 | 14.27 | 3.72  | 6 | 285.13             | 47.35  | 5 | 130.48 | 16.26  | 3 | 54.4                   |
| Brain                | 2.81  | 0.62  | 3 | 351.15             | 11.55  | 2 | 334.76 | 42.39  | 2 | -                      |
